# Supplementary material for: Comparison of Multivariate ANOVA-Based Approaches for the Determination of Relevant Variables in Experimentally Designed Metabolomic Studies
Source: Molecules. 2022 May 20;27(10):3304. doi: 10.3390/molecules27103304 (PMC9147242; doi:10.3390/molecules27103304)
Supplement: Supplementary file 1 [file molecules-27-03304-s001.zip › SuppMaterialB_rev.xlsx]

## Sheet: MS-DIAL parameters
Start up a project	HILIC-HRMS method
Ionization type	Soft ionization
Separation type	Chromatography (LC)
Method type	Data dependent MS/MS
Data type (MS1)	Profile
Data type (MS/MS)	Profile
Ion mode	Negative ion mode
Target omics	Metabolomics
Data collection
MS1 tolerance	0.01
MS2 tolerance	0.01
Retention time begin	0
Retention time end	20
Mass range begin	50
Mass range end	1700
Maximum charged number	2
Consider Cl and Br elements	Unchecked
Number of threads	20
Execute retention time corrections	Unchecked
Peak detection
Minimum peak height	500
Mass slice width	0.1
Smoothing method	Linear weighted moving average
Smoothing level	3
Minimum peak width	5
Exclusion mass list (tolerance: 0.01Da)	922.01
MS2Dec
Sigma window value	0.5
MS2Dec amplitude cut off	100
Exclude after precursor	Checked
Keep isotope until	0.5
Keep the isotopic ion w/o MS2Dec	Unchecked
Identification
Retention time tolerance	0.5
Accurate mass tolerance (MS1)	0.01
Accurate mass tolerance (MS2)	0.015
Identification score cut off	70
Use retention time for scoring	Unchecked
Use retention time for filtering	Unchecked
Postidentification	Not used
Adduct
Molecular species	[M-H]-, [M+CH3OH-H]-, [M-H-H2O]-
Alignment
Retention time tolerance	0.05
MS1 tolerance	0.015
Retention time factor	0
MS1 factor	1
Peak count filter	0
N% detected in at least one group	0
Remove feature based on blank information	Unchecked
Sample average / blank average	5
Keep "reference matched" metabolite features	Checked
Keep "suggested (w/o MS2)" metabolite features	Unchecked
Keep removable features and assign the tag	Checked
Gap filling by compulsion	Checked
Isotope tracking
	Not used

## Sheet: ID_Metabolites
										Control vs High - BPA exposure					Control vs High - E2 exposure
Average Rt(min)	Average Mz	Metabolite name	Adduct	HMDB	PubChem	KEGG	Chemical formula	Accurate mass	delta (ppm)	gasca	asca	rmanova	vips	selrat	gasca	asca	rmanova	vips	selrat	MS/MS spectrum
13.992	104.036	Serine	[M-H]-	HMDB0062263	5951	C00716	C3H7NO3	105.043	15.2058	0.0547848	0.0137153	0.0160538	1.11649	1.11491	0.0159237	0.00250429	0.00292459	0.191529	0.0239271	74.02399:561
13.688	118.052	Threonine	[M-H]-	HMDB0000167	6288	C00188	C4H9NO3	119.058	13.5694	0.0418957	0.0143313	0.0115606	0.782028	0.420991	0.0125543	0.0033855	0.0210425	0.213743	0.0178803	74.0238:359
3.573	121.029	Benzoic acid	[M-H]-	HMDB0001870	243	C00539	C7H6O2	122.037	0.614738	0.066066	0.00341405	0.092629	1.57681	2.58262	0.0278364	0.00116669	0.0118523	0.303201	0.0577011	77.03995:189 91.0181:190 92.02766:442 120.02243:191 121.02903:1640
10.927	124.009	Taurine	[M-H]-	HMDB0000251	1123	C00245	C2H7NO3S	125.015	14.8479	0.0621031	0.00419553	0.0221153	1.38862	2.07943	0.000534521	2.20878e-05	0.0111841	0.124298	9.90512e-06	124.00857:389
11.039	128.036	Pyroglutamic acid	[M-H]-	HMDB0000267	7405	C01879	C5H7NO3	129.043	12.1212	0.0151709	0.00616919	0.0149919	0.307573	0.0579155	0.0828844	0.057399	0.0856599	2.71355	3.04825	128.03227:187
13.512	130.06	Creatine	[M-H]-	HMDB0000064	586	C00300	C4H9N3O2	131.069	9.08427	0.0670558	0.0498244	0.0365123	1.60869	4.08429	0.0372239	0.0145126	0.0297656	0.59577	0.147511	88.03874:2153
9.143	130.088	L-Leucine	[M-H]-	HMDB0000687	6106	C00123	C6H13NO2	131.095	11.1953	0.0396968	0.0576395	0.0126829	0.79059	0.383607	0.0457024	0.0856767	0.0533059	1.00728	0.260009	130.08809:210
6.91	135.031	Hypoxanthine	[M-H]-	HMDB0000157	790	C00262	C5H4N4O	136.039	3.80848	0.0584872	0.0768569	0.00716184	1.25546	1.52719	0.0128216	0.0115296	0.00289145	0.171794	0.0260592	65.01337:739 66.01033:112 75.00942:237 92.02406:3123 133.01642:233 135.0312:672
7.623	140.01	O-Phosphoethanolamine	[M-H]-	HMDB0000224	1015	C00346	C2H8NO4P	141.019	8.35096	0.0686802	0.00429613	0.0491824	1.71428	5.5426	0.0346666	0.00117823	0.0271163	0.537301	0.13018	140.00606:104
10.961	146.047	L-Glutamic acid	[M-H]-	HMDB0000148	33032	C00025	C5H9NO4	147.053	10.5943	0.0586809	0.0903857	0.0121176	1.26082	1.5738	0.0143989	0.0121639	0.0160299	0.213334	0.0272301	102.05522:1244 128.03622:227
10.938	152.083	N-omega-Acetylhistamine	[M-H]-	HMDB0013253	69602	C05135	C7H11N3O	153.09	6.00361	0.0624335	0.00715399	0.017954	1.39768	2.09142	0.0457648	0.00339569	0.0414227	0.842663	0.245543	58.03081:248 80.0386:370 81.04467:348 110.07127:2522
16.097	154.061	Histidine	[M-H]-	HMDB0000177	6274	C00135	C6H9N3O2	155.069	5.78674	0.0509787	0.213514	0.0583914	0.930122	0.682133	0.0163061	0.0674537	0.00999073	0.21154	0.0262712	72.00764:115 80.03858:416 81.04465:173 93.04604:2083 102.13209:251 108.055:127 110.07124:303 137.03307:116 154.06078:152
8.889	166.973	Phospho(enol)pyruvic acid	[M-H]-	HMDB0000263	1005	C00074	C3H5O6P	167.982	11.9741	0.0466153	0.0134361	0.0124981	0.9206	0.618205	0.0594943	0.00931794	0.0621886	1.40899	0.55017	78.95869:5935
3.103	171.138	Decanoic acid	[M-H]-	HMDB0000511	2969	C01571	C10H20O2	172.146	2.30721	0.0370382	0.00116192	0.0338959	0.73187	0.367062	0.027912	0.000654035	0.0768023	0.308699	0.059744	171.13811:263
12.562	174.038	N-Acetylaspartic acid	[M-H]-	HMDB0000812	65065	C01042	C6H9NO5	175.048	11.1317	0.054704	0.190841	0.00321476	1.12961	1.12866	0.0460259	0.0845885	0.0539912	0.86325	0.240129	58.03087:857 70.03085:105 71.01293:147 78.95894:265 88.03902:903 115.00421:117 130.04869:109
8.202	178.036	Isoxanthopterin	[M-H]-	HMDB0000704	135398700	C03975	C6H5N5O2	179.044	2.13101	0.064718	0.0135427	0.021182	1.49812	2.81102	0.0313301	0.00375063	0.0221567	0.44857	0.0983148	65.0136:959 65.99932:158 90.01084:147 92.02438:112 108.0192:172 135.03169:227 136.0145:1489 161.00896:385 178.03676:460
10.391	180.064	Tyrosine	[M-H]-	HMDB0000158	6057	C00082	C9H11NO3	181.074	8.82005	6.13534e-05	2.89456e-05	0.0444254	0.481944	0.000300985	0.0277145	0.00824917	0.019641	0.456541	0.0928429	72.00779:120 106.0398:116 119.05033:1010 163.03937:358
13.934	191.021	Citric acid	[M-H]-	HMDB0000094	311	C00158	C6H8O7	192.027	9.69757	0.00803895	0.00305707	0.0210335	0.216359	0.00704247	0.0494407	0.0251865	0.0302358	1.03487	0.407406	57.0336:493 67.01793:507 85.02973:821 87.00967:2033 111.00991:1083
10.96	196.07	N-Acetylhistidine	[M-H]-	HMDB0032055	273260	C02997	C8H11N3O3	197.08	9.61989	0	0	0	0	0	0	0	0	0	0	59.01285:146 80.03868:257 81.04475:614 93.04615:919 108.05514:144 110.07138:10294 134.07243:240 137.03728:305 154.06096:1416
4.884	218.1	Pantothenate (vitamine B5)	[M-H]-	HMDB0000210	6613	C00864	C9H17NO5	219.111	13.2856	0.0523355	0.00710385	0.0318282	0.989302	0.785812	0.00715646	0.000660753	0.0144529	0.124245	0.0100676	71.05093:312 80.96388:215 88.03913:1080 99.044:116 146.08057:568
15.252	221.058	Cystathionine	[M-H]-	HMDB0000099	439258	C02291	C7H14N2O4S	222.067	5.80207	0.0505682	0.00358177	0.0232937	1.00387	0.916189	0.0169163	0.000606927	0.000155884	0.203274	0.025804	120.01102:234 134.02832:410
10.598	229.01	D-Arabinose-5-phosphate	[M-H]-	HMDB0011734	188324	C01112	C5H11O8P	230.019	7.11235	0.0542113	0.00406327	0.0417751	1.07447	1.00238	0.0166646	0.00107709	0.0561973	0.290304	0.0190544	78.95895:1865 96.96817:856 138.98021:296 210.99992:143
12.77	259.019	D-Fructose-6-phosphate	[M-H]-	HMDB0000124	69507	C00085	C6H13O9P	260.03	10.9006	0.0536597	0.00374433	0.0297839	1.05232	1.12274	0.0612195	0.00403071	0.0590269	1.4794	0.568386	78.95869:992 96.96785:2647
3.914	261.134	9-(2,3-dihydroxypropoxy)-9-oxononanoic acid	[M-H]-	NA	45783154	NA	C12H22O6	262.142	0.593688	0.0660889	0.00219803	0.0200554	1.56991	3.90169	0.0315516	0.000552691	0.019999	0.453854	0.100508	61.01776:109 125.09753:162 187.09627:282
8.007	267.072	Inosine	[M-H]-	HMDB0000195	6021	C00294	C10H12N4O5	268.081	4.80948	0.06102	0.0766835	0.0668521	1.3432	2.03448	0.0584874	0.0428115	0.0985583	1.50338	0.49928	92.02406:205 135.0312:6010 149.043:134
2.925	269.248	Heptadecanoic acid	[M-H]-	HMDB0002259	10465	NA	C17H34O2	270.256	0.948197	0.00344891	2.89e-05	0.0131084	0.0770779	0.000108714	0.0633899	0.00219613	0.0587955	1.57074	0.792694	57.03363:131 62.96278:130 102.9451:105 225.21893:123 269.24753:1423
2.921	281.249	Oleic acid	[M-H]-	HMDB0000207	445639	C00712	C18H34O2	282.256	5.06563	0.0331239	0.0230825	0.0348761	0.668346	0.259471	0.0507706	0.031608	0.0276248	1.03065	0.434512	136.09113:104 281.1395:112 281.24973:3310
9.179	282.086	Guanosine	[M-H]-	HMDB0000133	6802	C00387	C10H13N5O5	283.092	6.65221	0.0193037	0.00200844	0.0389391	0.141931	0.0410446	0.0749564	0.00565856	0.0936728	2.29474	1.16289	108.01913:275 133.0168:520 150.04198:5342 282.08002:258
8.202	303.08	N-Acetylaspartylglutamic acid	[M-H]-	HMDB0001067	5255	C12270	C11H16N2O8	304.091	10.0317	0.0574927	0.00204016	0.00142245	1.18944	1.37055	0.0119108	0.000701275	0.0226086	0.152707	0.0212217	58.02821:273 96.0097:860 102.05527:197 111.02082:185 128.03629:1366 135.0316:265 146.04688:278 267.07159:332
2.899	303.231	Arachidonic acid	[M-H]-	HMDB0001043	444899	C00219	C20H32O2	304.24	3.67783	0.0411638	0.00981988	0.0277148	0.791218	0.450689	0.0452272	0.0169207	0.0323414	0.839068	0.308203	59.01283:117 80.96375:122 259.24191:202 303.23126:561
2.55	311.169	Triptophenolide	[M-H]-	NA	173273	NA	C20H24O3	312.173	15.0404	0.0720636	0.0221855	0.0818205	1.89613	11.2943	0.0150968	0.00149517	0.00665466	0.206501	0.024708	80.96382:104 130.76787:102 183.01089:337 274.88031:402 292.89182:100 311.16962:9053
9.179	323.029	Uridine-5-monophosphate	[M-H]-	HMDB0000288	6030	C00105	C9H13N2O9P	324.036	3.61732	0.0541666	0.00983886	0.00272428	1.06602	0.985611	0.0751494	0.0152244	0.133134	2.19876	1.09609	78.95889:2732 96.96809:2364 111.02078:456 138.9801:172 150.98003:271 192.98659:159 210.99976:413 280.02075:156 323.02924:394
2.553	325.185	Hydroquinidine	[M-H]-	NA	NA	C10696	C20H26N2O2	326.199	21.4488	0.0706511	0.0222481	0.05554	1.80702	7.58892	0.0150406	0.00140487	0.00388145	0.203703	0.0247043	183.01089:245 243.10075:102 325.18484:8669
8.735	346.055	Adenosine Monophosphate	[M-H]-	HMDB0000045	6083	C00020	C10H14N5O7P	347.063	0.540468	0.0497572	0.0258093	0.0124536	0.941116	0.726679	0.0724227	0.0414574	0.135657	2.04206	0.920789	78.95895:4548 96.96818:1732 134.04842:605 150.98015:276 210.99994:308
9.625	347.041	Inosine 5'-phosphate	[M-H]-	HMDB0000175	8582	C00130	C10H13N4O8P	348.047	4.46933	0.0502743	0.0019043	0.0352846	1.0247	0.958008	0.0535868	0.00266783	0.00672371	1.19657	0.489556	78.95889:4734 96.96809:2148 135.03156:752 150.98003:358 210.99976:306 347.04065:632
2.622	349.113	Estrone-3-sulfate	[M-H]-	HMDB0001425	3001028	C02538	C18H22O5S	350.119	5.47255	0	0	0	0	0	0.096318	0.133182	0.304017	3.70335	12.0591	80.96374:267 269.15643:866 349.11282:7065
11.299	362.051	Guanosine 5'-monophosphate	[M-H]-	HMDB0001397	6804	C00144	C10H14N5O8P	363.058	1.25969	0.0594654	0.0117703	0.00949796	1.27745	1.75146	0.041008	0.00553576	0.0435348	0.706133	0.185473	78.95894:4997 96.96816:278 150.04202:260 319.04324:111 362.05048:840
13.949	383.113	S-Adenosyl-homocysteine	[M-H]-	HMDB0000939	439155	C00021	C14H20N6O5S	384.122	1.57509	0.0397365	0.00104593	0.0417329	0.769279	0.431095	0.000501123	8.67407e-06	0.0124483	0.14105	3.41898e-05	74.99174:231 86.99358:135 105.00195:121 134.04446:3510 188.03932:255 248.05653:216 383.11285:576
11.11	426.023	Adenosine 5'-diphosphate	[M-H]-	HMDB0001341	6022	C00008	C10H15N5O10P2	427.029	2.32449	0.0605587	0.0037372	0.00646105	1.3112	2.13943	0.055319	0.00245092	0.0533837	1.21167	0.417563	78.95888:1511 134.04428:1015 158.92577:2074 272.95587:357 328.04205:1452 408.00635:796
3.302	445.187	Estrone-3-(beta-D-glucuronide)	[M-H]-	HMDB0004483	115255	C11133	C24H30O8	446.194	2.12742	0	0	0	0	0	0.0895991	0.0273395	0.16489	3.242	4.01326	59.01266:366 75.00942:180 85.02946:457 89.0219:155 99.00912:234 103.00441:188 113.02363:2662 175.02048:729 269.15002:603 445.18591:1197
3.914	452.275	LPE(16:0)	[M-H]-	HMDB0011473	53480922	C05973	C21H44NO7P	453.286	5.40431	0.0619795	0.00711027	0.0270703	1.37997	2.28226	0.0781889	0.00397896	0.114873	2.38443	1.30356	140.00998:196 192.03139:124 196.03644:571 214.04646:124 255.22987:5888 452.27475:1590
7.903	455.098	Riboflavin-5'-monophosphate	[M-H]-	NA	NA	NA	C17H21N4O9P	456.105	1.83924	0.0456595	0.000733491	0.0365957	1.16403	0.653428	0	0	0	0	0	78.95898:183 96.96822:1067 135.03171:125 198.99791:350 213.01517:185 241.0712:107 255.08632:181 455.09024:245
11.625	579.025	UDP-D-Glucuronic acid	[M-H]-	HMDB0000935	17473	C00167	C15H22N2O18P2	580.034	3.00487	0	0	0	0	0	0	0	0	0	0	78.95869:212 158.92537:193 254.98592:499 305.01041:117 323.02841:1186 384.98285:292 402.98886:3172 579.02325:2606
10.041	606.076	Uridine 5'-diphospho-N-acetylgalactosamine	[M-H]-	HMDB0000304	1167	C00203	C17H27N3O17P2	607.082	3.90308	0	0	0	0	0	0	0	0	0	0	158.92154:174 272.95612:108 282.03366:318 300.04654:228 362.00443:168 384.98413:732 402.99023:295 606.07623:5290
13.499	611.146	Oxidized glutathione	[M-H]-	HMDB0003337	975	C00127	C20H32N6O12S2	612.152	3.0486	0.0264332	0.00097827	0.00491537	0.447351	0.111486	0.0372985	0.00188631	0.0399618	0.543203	0.165697	82.02901:103 128.03258:324 143.04376:127 177.03192:174 197.85272:119 203.05011:175 254.07626:402 272.08826:1255 304.05777:672 306.07623:6179 338.04431:682 482.10379:149 593.13129:134 611.14722:4465
12.853	662.1	beta-Nicotinamide adenine dinucleotide	[M-H]-	HMDB0000902	5893	C00003	C21H27N7O14P2	663.109	1.8979	0.0607826	0.0019067	0.0195655	1.32093	1.97896	0.0620711	0.0011834	0.0901251	1.51095	0.570795	272.9559:191 328.04208:182 408.01337:243 426.02264:314 540.05621:6973
										* in bold the metabolites included as the 50 most relevant for each statistical method tested (from Figure 4).
Range of signficance for each method and study:
BPA C vs H analysis	Max	Min
Vips	2.29	1.88826
Selectivity ratio (selrat)	224.512	6.06128
asca	0.588839	0.0262978
rmanova	0.907751	0.100005
gasca	0.0753027	0.0699849
E2 C vs H analysis	Max	Min
Vips	3.75627	2.31914
Selectivity ratio (selrat)	23.1375	1.43473
asca	0.783562	0.0174031
rmanova	0.367212	0.118248
gasca	0.097362	0.0758649
